# Supplementary material for: Expansion of Human Tregs from Cryopreserved Umbilical Cord Blood for GMP-Compliant Autologous Adoptive Cell Transfer Therapy
Source: PubMed Central journal article supplement — Mol Ther Methods Clin Dev. 2016 Dec 24;4:178–91. doi: 10.1016/j.omtm.2016.12.003 (PMC5363324; doi:10.1016/j.omtm.2016.12.003), 2016-12-24
Supplement: mmc1.pdf [file mmc1.pdf]

**OMTM, Volume 4**

## **Supplemental Information**

**Expansion of Human Tregs from Cryopreserved**

**Umbilical Cord Blood for GMP-Compliant**

**Autologous Adoptive Cell Transfer Therapy**

**Howard R. Seay, Amy L. Putnam, Judit Cserny, Amanda L. Posgai, Emma H. Rosenau, John R. Wingard, Kate F. Girard, Morey Kraus, Angela P. Lares, Heather L. Brown, Katherine S. Brown, Kristi T. Balavage, Leana D. Peters, Ashley N. Bushdorf, Mark A. Atkinson, Jeffrey A. Bluestone, Michael J. Haller, and Todd M. Brusko**

# Supplement

## Supplementary Figure 1

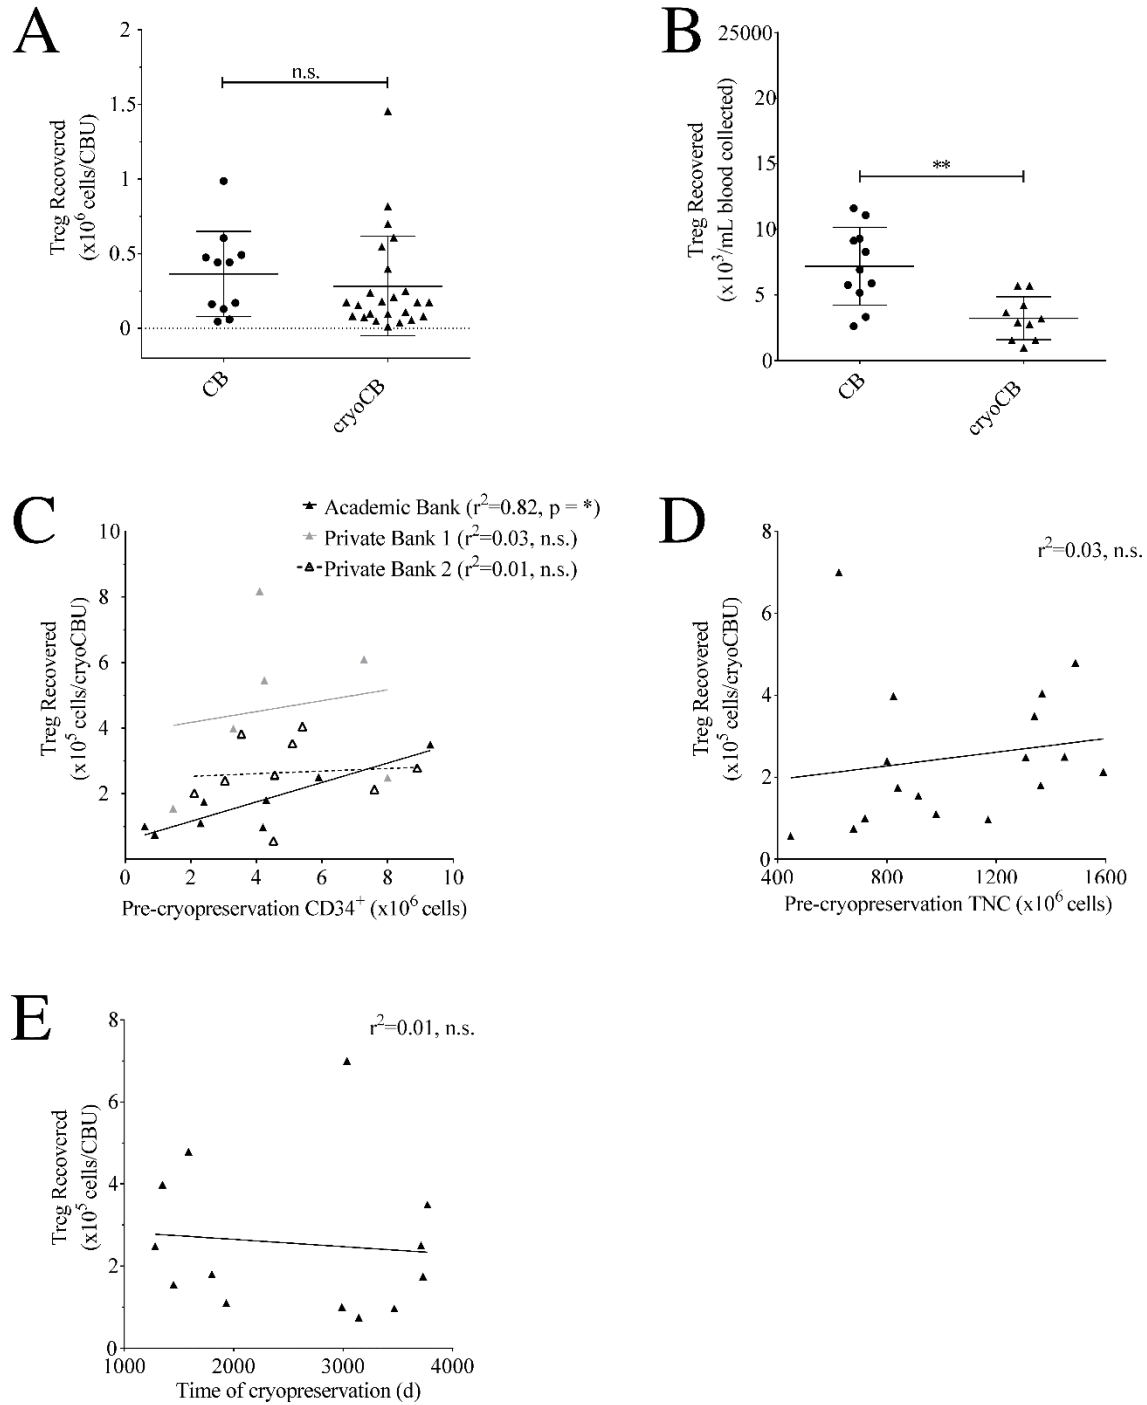

**Supplementary Figure 1. Regulatory T cell (Tregs) recovery from fresh umbilical cord blood (CB) and cryopreserved umbilical cord blood (cryoCB).** The number of Tregs isolated (A) per umbilical cord blood units (CBU) was not significantly different for CB versus cryoCB (Welsh's unpaired t-test, NS =  $P \geq 0.05$ ), but (B) Treg per mL of cord was significantly less in cryoCB (Welsh's unpaired t-test;  $**P < 0.01$ ). (C) CD34<sup>+</sup> cell count prior to cryopreservation was significantly correlated with Treg recovery from cryoCB units obtained from an academic CB bank [University of Florida Stem Cell Lab (UFSCCL), black triangles] ( $*P < 0.05$ ,  $r^2 = 0.823$ ) but there was no correlation for cryoCB units obtained from either private bank institution (Private Bank 1 and 2, gray and open triangles, respectively) (NS =  $P \geq 0.05$ ,  $r^2 = 0.028$ ). (D) Total nucleated cell (TNC) count prior to cryopreservation and (E) duration of cryopreservation (d=days) were not significantly correlated with Treg recovery from cryoCB (NS =  $P \geq 0.05$ ;  $r^2 = 0.001$  and  $r^2 = 0.009$ , respectively). (C-E) Statistical tests applied were linear regression with Pearson correlation.

# Supplementary Figure 2

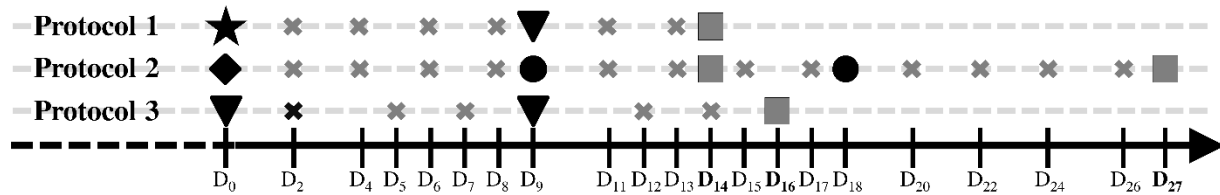

## Stimulation Methods

- ★ Artificial APC (1:1)
- ◆  $\alpha$ CD3/ $\alpha$ CD28 GMP ExpAct Beads (4:1)
- ▼  $\alpha$ CD3/ $\alpha$ CD28 GMP Dynal Beads (1:1)
- $\alpha$ CD3/ $\alpha$ CD28 GMP ExpAct Beads (1:1)
- ✖ Addition of media and IL-2 (300U/mL)
- ✖ Addition of media and IL-2 (600U/mL)
- FOXP3 and Functional Analysis

**Figure S1. Timeline for *in vitro* expansion of Tregs isolated from fresh or cryopreserved umbilical cord blood according to three unique protocols.** Days (D<sub>0</sub>-D<sub>27</sub>) are indicated along the x-axis, and the manipulations to the culture are indicated using symbols defined in the figure. Protocol 1 follows a standard laboratory procedure for expanding Tregs for experimental purposes using artificial antigen-presenting cells (aAPC) loaded with anti-CD3 (OKT3). Protocols 2 and 3 involve Treg stimulation with anti-CD3 and anti-CD28 conjugated beads.

# Supplementary Table 1.

| <b>Culture Flask/Plate</b>  | <b>Minimum</b> | <b>Suggested</b> | <b>Maximum*</b> |
|-----------------------------|----------------|------------------|-----------------|
| 96-well, round-bottom plate | 25µL           | 50-200µL         | 360µL           |
| 96-well, flat-bottom plate  | 50µL           | 100-200µL        | 360µL           |
| 48-well plate               | 100µL          | 190-285µL        | 1300µL          |
| 24-well plate               | 200µL          | 380-570µL        | 2.6mL           |
| 12-well plate               | 400µL          | 0.76-1.14mL      | 6mL             |
| 6-well plate                | 800µL          | 1.9-2.9mL        | 15mL            |
| T-12.5                      | 1mL            | 2.5-3.75mL       | 8mL             |
| T-12.5 (upright)            | 250µL          | 500µL            | 20mL            |
| T-25                        | 2mL            | 5-7.5mL          | 15mL            |
| T-25 (upright)              | 500µL          | 1mL              | 40mL            |
| T-75                        | 8mL            | 15-22.5mL        | 75mL            |
| T-75 (upright)              | 2mL            | 4mL              | 175mL           |
| T-175                       | 20mL           | 35-52.5mL        | 80mL            |
| T-175 (upright)             | 5mL            | 10mL             | 400mL           |
| T-225                       | 28mL           | 45-67.5mL        | 125mL           |
| T-225 (upright)             | 7mL            | 14mL             | 1000mL          |

\*Some wide-mouth flasks with have a lower maximum volume.

---

**Table S1. Cryopreserved cord blood Treg (cryoCB Treg) culture plating volume recommendations.** A key technical aspect of ensuring the expansion of CB Treg is plating the cells for stimulation and restimulation at  $5.0 \times 10^5$  cells per mL of culture media in a vessel that will allow for doubling the volume at day 2 of culture without disturbing the cells. To that end, we made a reference table to assist those trying to reproduce the protocol.
